# Supplementary material
Source: publisher figshare collection journal article supplement (https://tandf.figshare.com/ndownloader/files/14768585)
Supplement: Supplementary file 1 [file 14768585]

**Supplemental Table 1.** GenBank accession numbers of ex-type strains of the *Isaria* genus

| Isolate | GenBank number a | |
| --- | --- | --- |
| Internal transcribed spacer (ITS) | β-tubulin |
| *Isaria andoi* ARSEF 1684 Ex-type |  | KY574460.1 |
| *Isaria cateniannulata* CBS 152.83 Ex-type | AY624172.1 | KY574462.1 |
| *Isaria cateniobliqua* CBS 153.83 Ex-type | AY624173.1 | KY574464.1 |
| *Isaria coleopterorum* CBS 110.73 Ex-type | AY624177.1 | KY574467.1 |
| *Isaria farinosa* ARSEF 7118 Ex-type |  | KY574468.1 |
| *Isaria flavovirescens* ARSEF 1686 Ex-type |  | KY574471.1 |
| *Isaria fumosorosea* CBS 244.31 Ex-type | AY624182.1 | KY574472.1 |
| *Isaria ghanensis* CBS 105.73 Ex-type | AY624185.1 | KY574475.1 |
| *Isaria javanica* CBS 134.22 Ex-type | AY624186.1 | KY574478.1 |
| *Isaria poprawskii* ARSEF 7028Ex-type |  | KY574489.1 |
| *Isaria tenuipes* ARSEF 5135 Ex-type | AY624196.1 | KY574491.1 |
| *Isaria javanica* CHE-CNRCB 310 | KT225592 | KT225601 |
| *Isarai javanica* pf185 | LY490787.1 | MH340496 |
| *Isaria javanica* pf212 | LY490786.1 | MH340497 |

a GenBank accession numbers of selected ex-type strains of the *Isaria* genus were obtained from the National Center for Biotechnology Information database. The sequences for the ITS and β-tubulin genes of *I. javanica* pf185 and pf212 have been deposited in GenBank with the designations shown in the Table.
